# Supplementary material for: A UV light enhanced TiO2/graphene device for oxygen sensing at room temperature
Source: Royal Society of Chemistry journal article supplement (doi:10.1039/c3ra43480j), 2013-01-01
Supplement: c3ra43480j.pdf [file c3ra43480j.pdf]

Supporting information for:

## UV light enhanced TiO<sub>2</sub>/graphene device for oxygen sensing at room temperature

Jia Zhang<sup>a, b</sup>, Chao Zhao<sup>b</sup>, Ping An Hu<sup>a\*</sup>, Yong Qing Fu<sup>b\*</sup>, Zhenlong Wang<sup>a\*</sup>, Wenwu Cao<sup>c</sup>,  
Bin Yang<sup>c</sup>, Frank Placido<sup>b</sup>

<sup>a</sup> Key Lab of Microsystem and Microstructure, Harbin Institute of Technology, Ministry of Education, No. 2 YiKuang Street, Harbin, 150080, China

<sup>b</sup> Thin Film Centre, Scottish Universities Physics Alliance (SUPA), University of the West of Scotland, Paisley, PA1 2BE, UK)

<sup>c</sup> Condensed Matter Science and Technology Institute, Harbin Institute of Technology, Harbin 150080, China

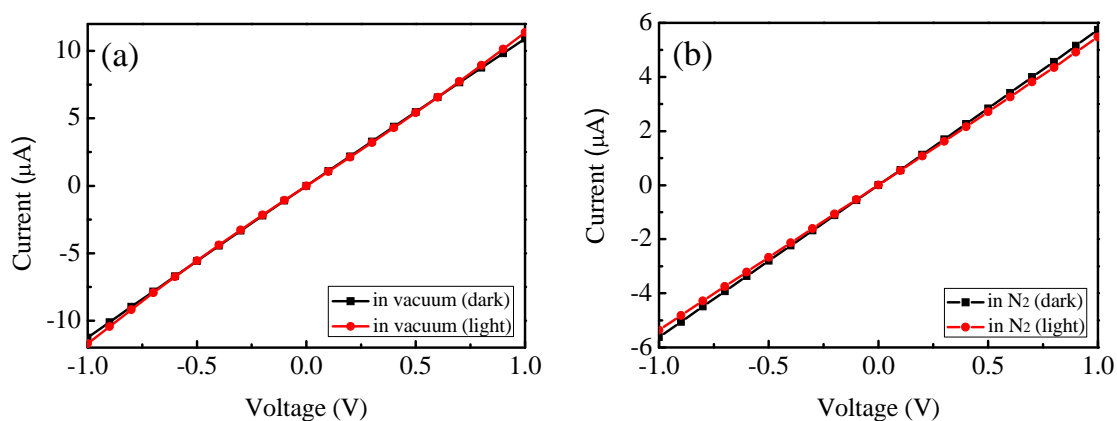

Fig. S1 Current-voltage (*I-V*) characteristics of the TiO<sub>2</sub>/graphene device in high vacuum (a) and in high purity N<sub>2</sub> atmosphere (b) with and without UV light.

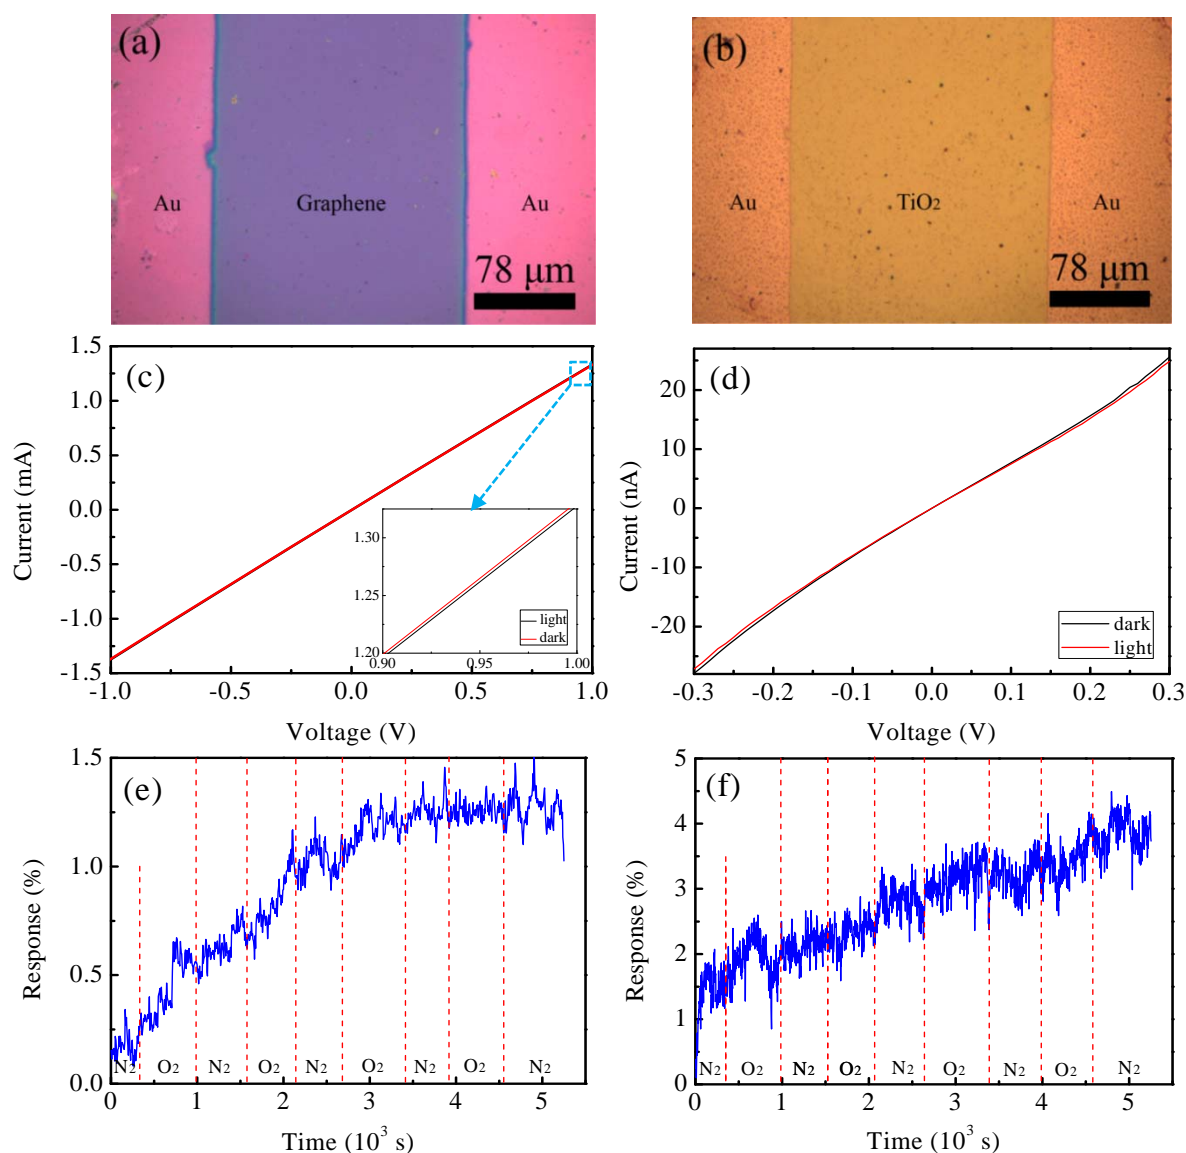

Fig. S2 Characteristics of O<sub>2</sub> sensing performance of the pristine graphene and TiO<sub>2</sub> device. Optical image of the pristine graphene (a) and TiO<sub>2</sub> device (b). (c) *I-V* curves of the pristine graphene device in O<sub>2</sub> with and without UV light, inset is enlarged curves. (d) *I-V* curves of the TiO<sub>2</sub> device in O<sub>2</sub> with and without UV light. (e) Response of the pristine graphene device sequent exposure to N<sub>2</sub> and O<sub>2</sub> with UV light,  $V_{\text{bias}}=1$  V. (f) Response of the TiO<sub>2</sub> device sequent exposure to N<sub>2</sub> and O<sub>2</sub> with UV light,  $V_{\text{bias}}=1$  V.
